# Supplementary material for: A comparative study of the catalytic activity of Co- and CoFe2O4-NPs in C–N and C–O bond formation: synthesis of benzimidazoles and benzoxazoles from o-haloanilides
Source: Royal Society of Chemistry journal article supplement (doi:10.1039/c6nj02293f), 2016-01-01
Supplement: c6nj02293f1.pdf [file c6nj02293f1.pdf]

## Supplementary Information

### **A comparative study between Co- and CoFe<sub>2</sub>O<sub>4</sub>-NPs catalytic activity in C–N and C–O bond formation: synthesis of benzimidazoles and benzoxazoles from o-haloanilides**

Abdol R. Hajipour <sup>a,b\*</sup>, Zahra Khorsandi<sup>a</sup>

<sup>a</sup> *Department of Chemistry, Isfahan University of Technology, Isfahan, 84156-83111, I. R. Iran.*

<sup>b</sup> *Department of Neuroscience, University of Wisconsin, Medical School, Madison, WI53706-1532, USA*

# 1. Characterization of Catalysts:

## Co-NPs

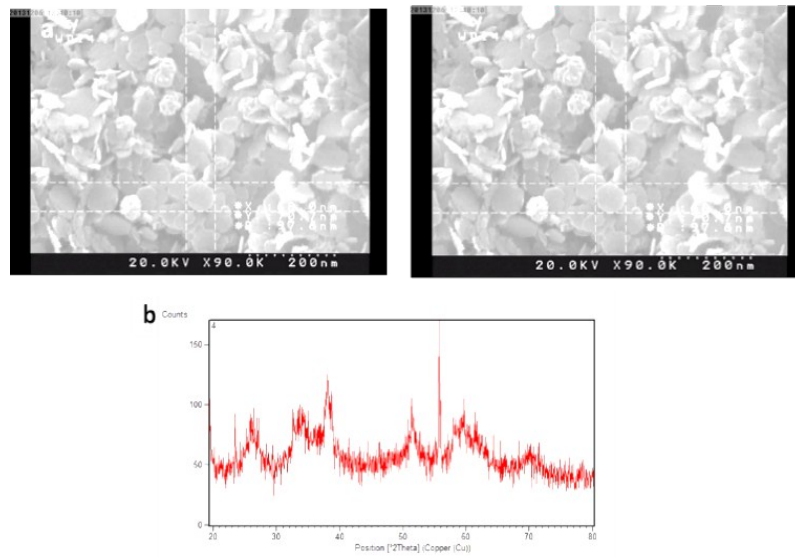

Figure 1s. The FE-SEM images and b: XRD patterns of Co-NPs

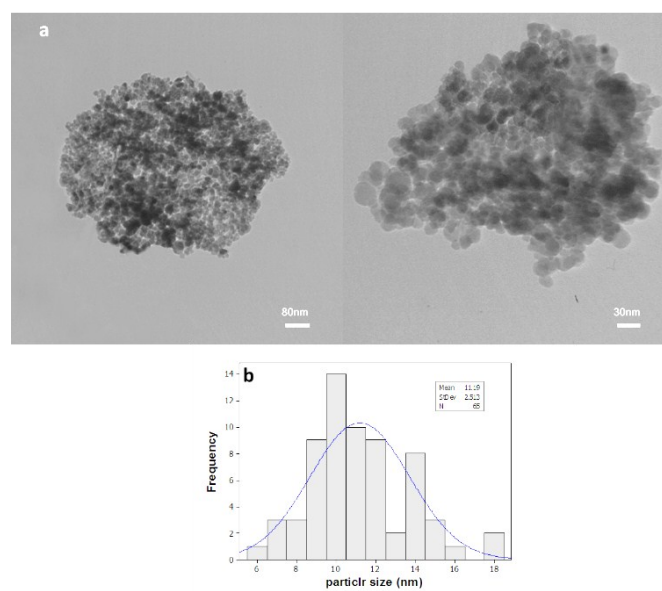

Figure 2s a: TEM images and b: particle size distribution results for Co-NPs

## CoFe<sub>2</sub>O<sub>4</sub>-NPs:

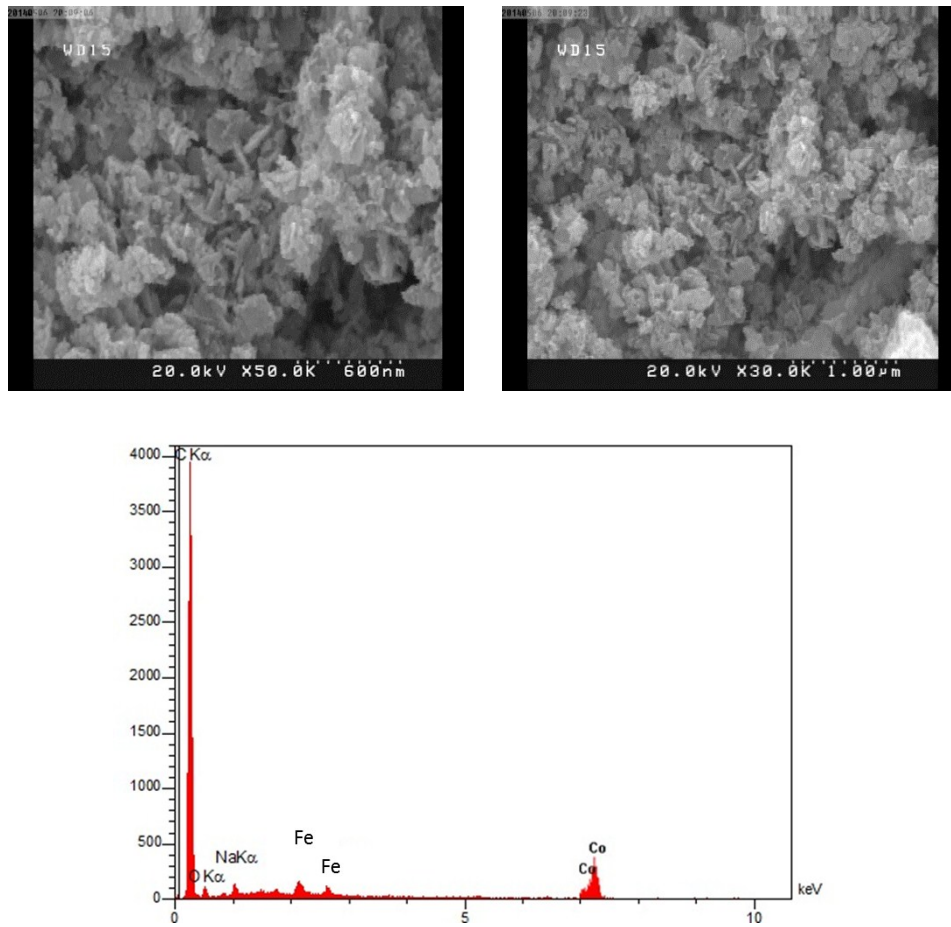

Figure 3s The FE-SEM images and SEM-EDX spectra of CoFe<sub>2</sub>O<sub>4</sub>-NPs.

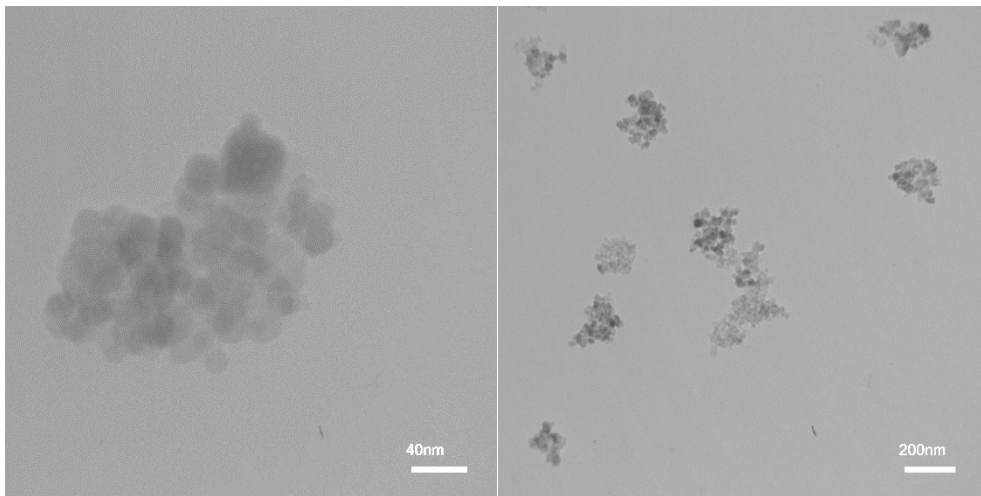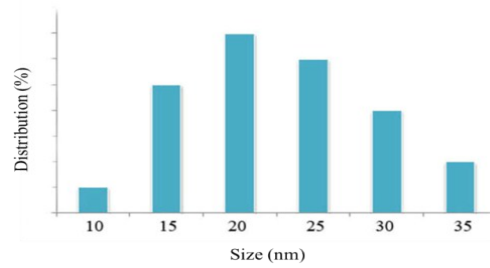

Figure 4s TEM images and particle size distribution results for  $\text{CoFe}_2\text{O}_4$ -NPs

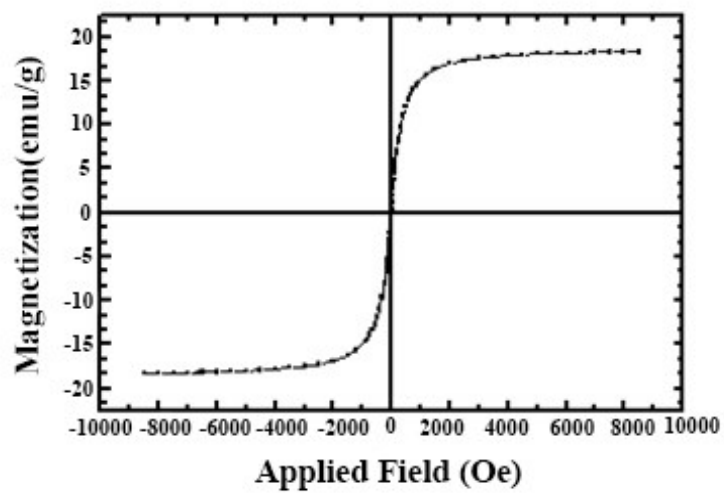

Figure 5s Room temperature magnetization curves of  $\text{CoFe}_2\text{O}_4$ -NPs

**Table 1s.** Recyclability of Co-NPs.

| Run | Yield <sup>a</sup> (%) | Run | Yield <sup>a</sup> (%) |
|-----|------------------------|-----|------------------------|
| 1   | 94                     | 4   | 88                     |
| 2   | 93                     | 5   | 86                     |
| 3   | 90                     | 6   | 74                     |

<sup>a</sup>Isolated yield.**Table 2s.** Recyclability of CoFe<sub>2</sub>O<sub>4</sub>-NPs

| Run | Yield <sup>a</sup> (%) | Run | Yield <sup>a</sup> (%) <sup>a</sup> |
|-----|------------------------|-----|-------------------------------------|
| 1   | 73                     | 4   | 69                                  |
| 2   | 73                     | 5   | 69                                  |
| 3   | 71                     | 6   | 67                                  |

<sup>a</sup>Isolated yield.

## 2. Characterization of products

**1 (Table 2)** White solid; mp 101–106 °C; <sup>1</sup>H NMR (400 MHz, CDCl<sub>3</sub>): δ 7.28–7.58 (m, 9H), 7; <sup>13</sup>C NMR (120 MHz, CDCl<sub>3</sub>): δ 141.6, 139.9, 138.3, 134.4, 133.9, 129.7, 126.0, 121.4, 110.6. FT-IR (neat) 3518, 3060, 2949, 2920, 2857, 1642, 1610, 1501, 1461, 1455, 1441, 1358, 1326, 1305, 1265, 1074, 1136, 1155, 1103 cm<sup>-1</sup>.

**2 (2)** White solid; mp 93–94 °C; <sup>1</sup>H NMR (CDCl<sub>3</sub>, 400 MHz): δ 7.68–7.19 (m, 8H); <sup>13</sup>C NMR (CDCl<sub>3</sub>, 120 MHz): δ 162.7, 150.1, 140.3, 134.7, 130.9, 128.4, 127.9, 126.8, 125.3, 123.9, 121.2; FT-IR (KBr) 3054, 2920, 2856, 1424, 1657, 1615, 1554, 1481, 1448, 1351, 1337, 1242, 1021, 1175, cm<sup>-1</sup>. Anal. Calcd (%) for C<sub>13</sub>H<sub>8</sub>N<sub>2</sub>O<sub>3</sub>: C, 60; H, 3; N, 17; found: C, 62.1; N, 16.8. <sup>4</sup>

**3 (2)** White solid; mp; 103–104 °C <sup>1</sup>H NMR (CDCl<sub>3</sub>, 400 MHz): δ 8.54–8.52 (m, 1H), 7.59–6.59 (m, 7H) <sup>13</sup>C NMR (CDCl<sub>3</sub>, 120 MHz): δ 162.1, 150.7, 142.3, 136.7, 131.9, 128.9, 127.9, 126.8, 126.3; FT-IR (KBr) 3058, 2921, 2856, 1428, 1647, 1605, 1524, 1431, 1458, 1361, 1327, 1252, 1021, 1165, cm<sup>-1</sup>.

**4 (2)** White solid; mp 86–88 °C; <sup>1</sup>H NMR (CDCl<sub>3</sub>, 400 MHz): δ 7.94–7.07 (m, 8H), 2.33–2.23 (s, 3H); FT-IR (KBr) 3064, 2920, 2846, 1424, 1657, 1610, 1554, 1483, 1440, 1350, 1339, 1248, 1041, 1185, cm<sup>-1</sup>.

**5 (2)** White solid; mp 156–157 °C; <sup>1</sup>H NMR (400 MHz, CDCl<sub>3</sub>): δ 7.89–7.10 (m, 8H); <sup>13</sup>C NMR (120 MHz, CDCl<sub>3</sub>): δ 156.5, 151.2, 142.6, 133.4, 129.6, 126.8, 153.4, 143.9, 139.9, 138.3, 110.6. FT-IR (neat) 3520, 3060, 2949, 2920, 2857, 1642, 1610, 1505, 1472, 1455, 1441, 1378, 1326, 1305, 1265, 1074, 1136, 1155, 1192 cm<sup>-1</sup>.

**6 (2)** White solid; mp 126–128 °C; <sup>1</sup>H NMR (400 MHz, CDCl<sub>3</sub>): δ 8.49–6.91 (m, 8H), 3.91 (s, 3 H), <sup>13</sup>C NMR (120 MHz, CDCl<sub>3</sub>): δ 158.5, 152.2, 145.9, 142.6, 139.0, 138.9, 133.4, 129.6, 126.8, 93. FT-IR (neat) 3420, 3050, 2949, 2920, 2857, 1662, 1610, 1505, 1472, 1450, 1449, 1368, 1328, 1315, 1265, 1172, 1136, 1165, 1074, cm<sup>-1</sup>.

**7 (2)** White solid; yield 92%; mp 116–117 °C; <sup>1</sup>H NMR CDCl<sub>3</sub>, 400 MHz: δ 7.92–7.31 (m, 8H); <sup>13</sup>C NMR (CDCl<sub>3</sub>, 120 MHz): δ 164.5, 156.8, 145.3, 134.4, 130.1, 127.6, 127.6, 124.2, 120.7, 110.3; FT-IR (KBr) 3430, 3281, 2967, 2924, 2855, 1651, 1459, 1437, 1411, 1346, 1242, 1175, 1021 cm<sup>-1</sup>. Anal. Calcd (%) for C<sub>13</sub>H<sub>10</sub>N<sub>2</sub>O: C, 74.3; H, 4.8; N, 13.3; found: C, 74.8; N, 13.9.3.

**1 (Table 3)** Yellow solid; mp 123–124 °C, <sup>1</sup>H NMR (400 MHz, CDCl<sub>3</sub>): δ 7.94–7.07 (m, 12H), 2.33–2.23 (s, 3H), <sup>13</sup>C NMR (100 MHz, CDCl<sub>3</sub>): δ 153.6, 143.8, 139.4, 136.2, 130.2, 129.8, 128.0, 127.2, 124.6, 123.4, 121.3; FT-IR (KBr) 3521, 3053, 3012, 2985, 1658, 1590, 1490, 1472, 1459, 1377, 1332, 1311, 1284, 1245, 1178, 1081, 1032 cm<sup>-1</sup>.

**2 (3)** Yellow solid; mp 117–119 °C, <sup>1</sup>H NMR (400 MHz, CDCl<sub>3</sub>): δ 7.63–7.33 (m, 12H), FT-IR (KBr) 3518, 3054, 3029, 2982, 1660, 1587, 1491, 1486, 1441, 1377, 1329, 1305, 1279, 1265, 1168, 1075, 1034 cm<sup>-1</sup>.

**3 (3)** Yellow solid; mp 115–116 °C, <sup>1</sup>H NMR (400 MHz, CDCl<sub>3</sub>): δ 7.38–7.28 (m, 12 H), 3.88 (s, 3H); <sup>13</sup>C NMR (100 MHz, CDCl<sub>3</sub>): δ 152.6, 143.2, 137.4, 137.2, 131.2, 129.3, 128.6, 127.5, 124.6, 123.8, 120.3; FT-IR (KBr) 3522, 3054, 3032, 2972, 1662, 1577, 1495, 1486, 1454, 1389, 1322, 1321, 1274, 1265, 1178, 1081, 1034 cm<sup>-1</sup>.

**4 (3)** White solid; mp 119–120 °C; <sup>1</sup>H NMR (400 MHz, CDCl<sub>3</sub>): δ 7.89–7.87 (m, 2H), 7.61(m, 2H), 7.35–7.22 (m, 2H), 7.02–6.99 (m, 4H), 3.88 (s, 3H) <sup>13</sup>C NMR (120 MHz, CDCl<sub>3</sub>): δ 159.5, 152.6, 143.0, 137.7, 130.1, 129.9, 127.9, 127.4, 124.0, 123.8, 123.1, 118.9, 114.8, 110.3; FT-IR (KBr) 3543, 3062, 2957, 2839, 1606, 1546, 1514, 1472, 1458, 1442, 1353, 1325, 12285, 1210, 1186, 1074, 1028 cm<sup>-1</sup>. Anal. Calcd (%) for C<sub>19</sub>H<sub>14</sub>N<sub>3</sub>O<sub>3</sub>: C, 68.68; H, 4.22; N, 12.65; found: C, 70.01; H, 4.35; N, 12.24.

**5 (3)** Yellow solid; mp 109–110 °C, <sup>1</sup>H NMR (400 MHz, CDCl<sub>3</sub>): δ 7.79–7.83(m, 2H), 7.28–7.22 (m, 4H), 7.01–7.09 (m, 2H), 6.84–6.91 (m, 2H), 6.79–6.76 (m, 2H); <sup>13</sup>C NMR (100 MHz, CDCl<sub>3</sub>): δ 152.6, 143.2, 137.4, 137.2, 131.2, 129.3, 128.6, 127.5, 124.6, 123.8, 120.3; FT-IR (KBr) 3520, 3050, 3022, 2982, 1658, 1597, 1490, 1476, 1451, 1387, 1322, 1301, 1274, 1255, 1178, 1071, 1024 cm<sup>-1</sup>. Anal. Calcd (%) for C<sub>19</sub>H<sub>14</sub>N<sub>2</sub>O<sub>2</sub>: C, 75.50; H, 4.63; N, 9.27; found: C, 74.89; H, 4.23; N, 9.28.

**6 (3)** Yellow liquid; <sup>1</sup>H NMR (400 MHz, CDCl<sub>3</sub>): δ 7.82–7.86 (m, 2H), 7.20–7.16 (m, 4H), 7.05–7.09 (m, 2H), 6.74–6.82 (m, 2H), 6.75–6.72 (m, 2H). <sup>13</sup>C NMR (100 MHz, CDCl<sub>3</sub>): δ 153.5, 145.3, 139.7, 135.4, 132.1, 130.4, 129.8, 128.7, 127.3, 123.4, 129.9, 120.0, 110.9. FT-IR (neat) 3451, 3058, 2932, 1649, 1606, 1554, 1447, 1401.1, 1372.1, 1261, 1019 cm<sup>-1</sup>. Anal. Calcd (%) for C<sub>19</sub>H<sub>15</sub>N<sub>3</sub>O: C, 75.75; H, 5.00; N, 13.95; found: C, 74.60; H, 5.04; N, 14.06.

1 (2)

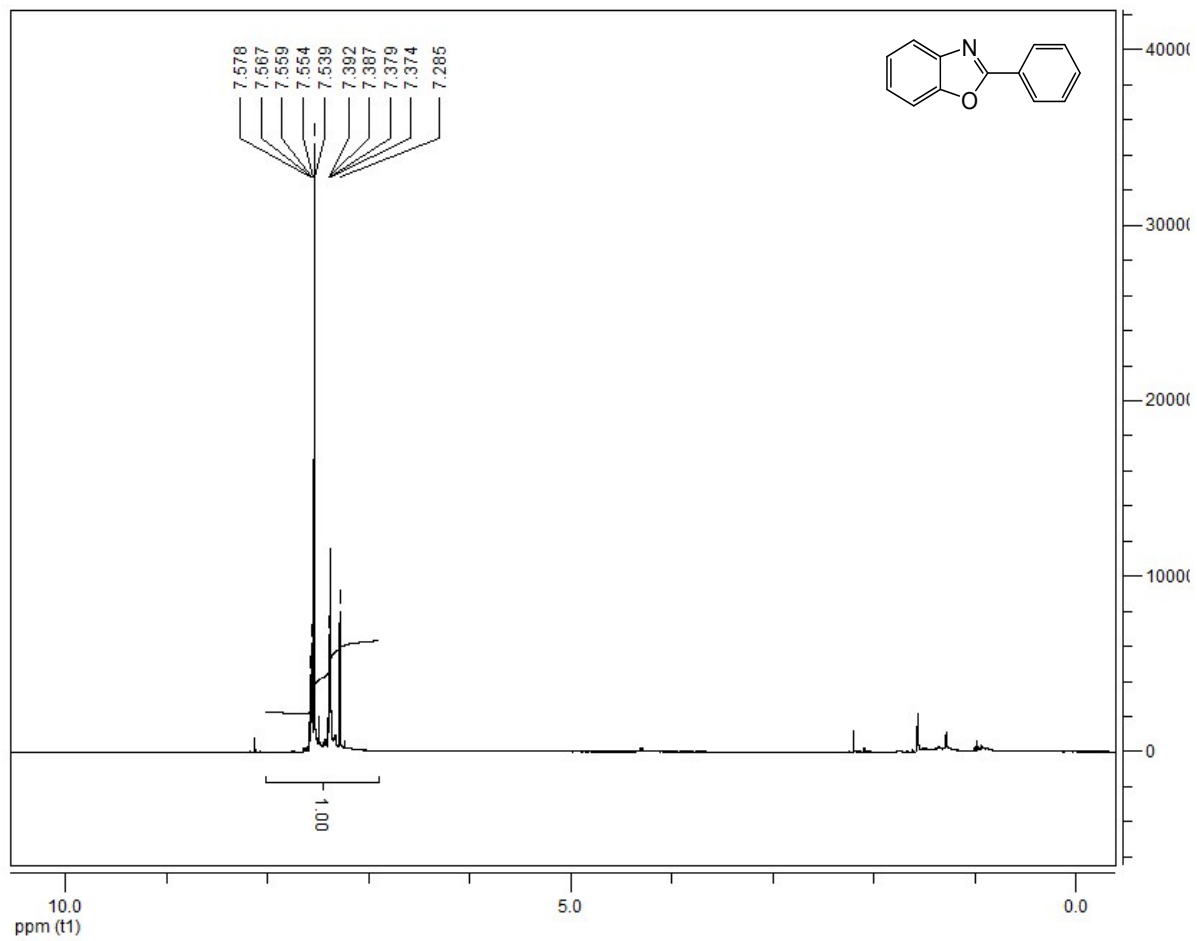



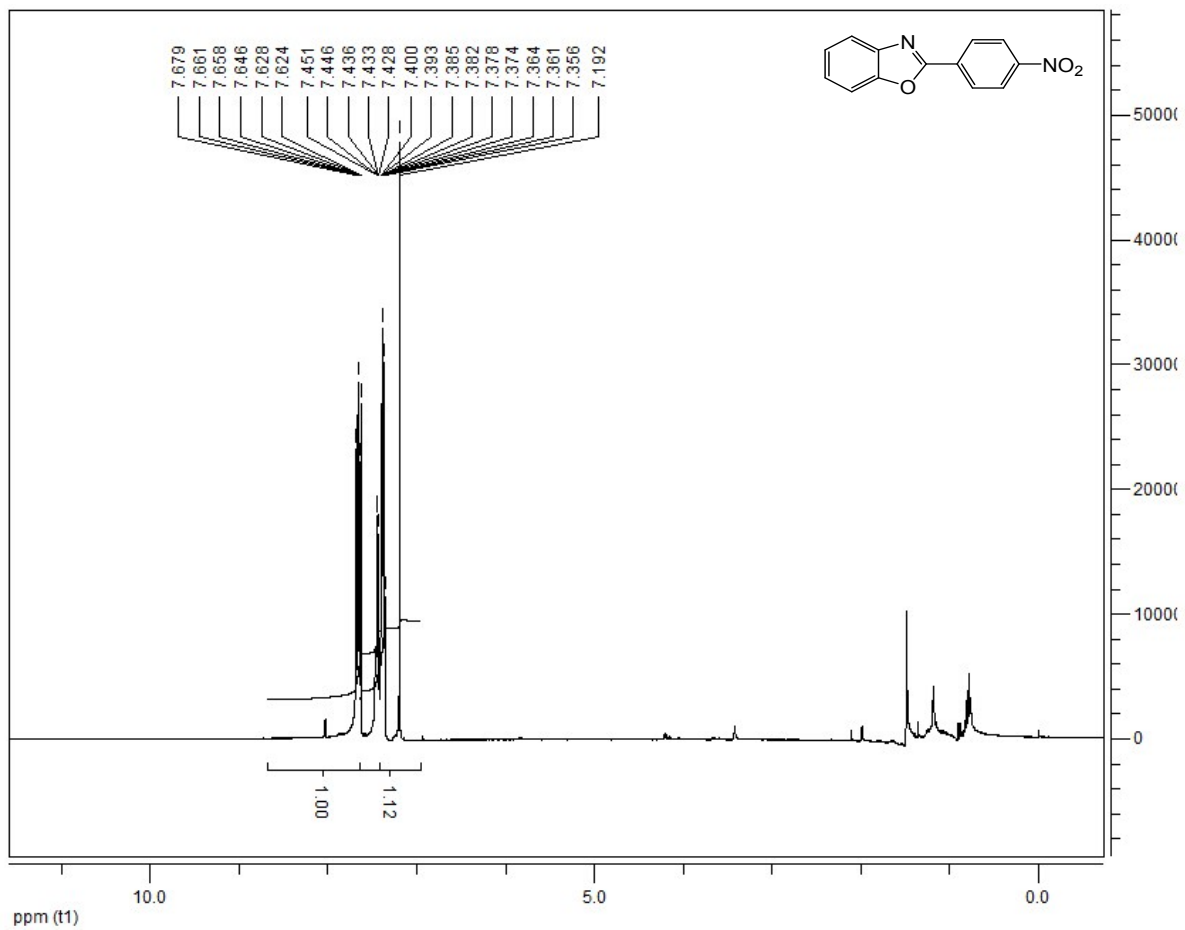

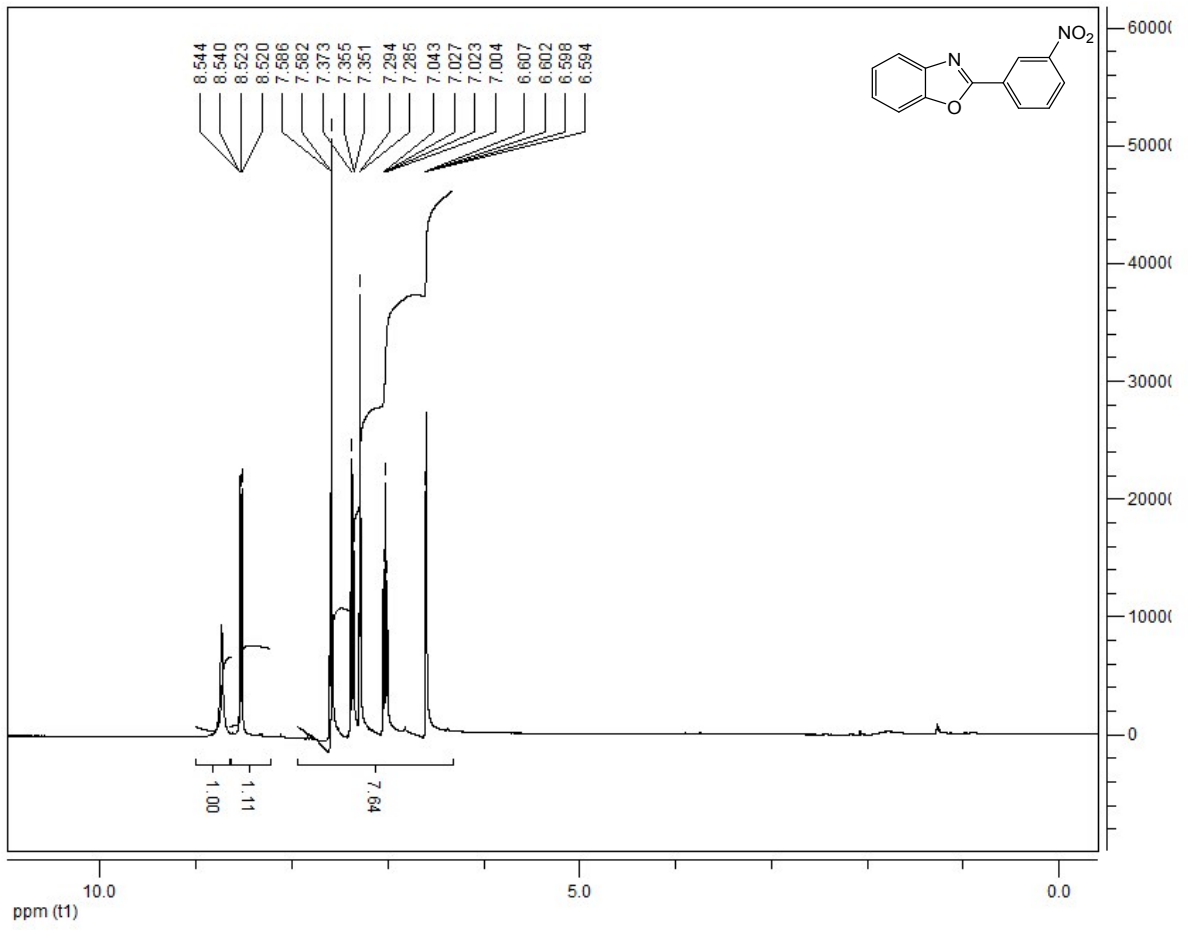

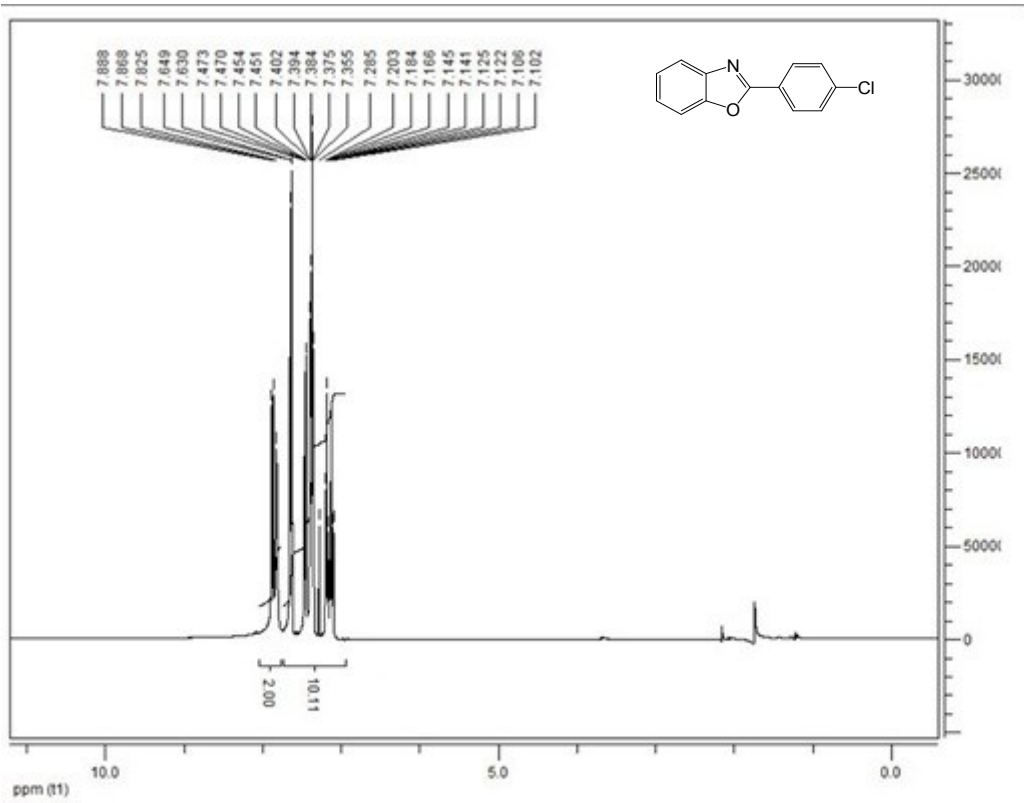

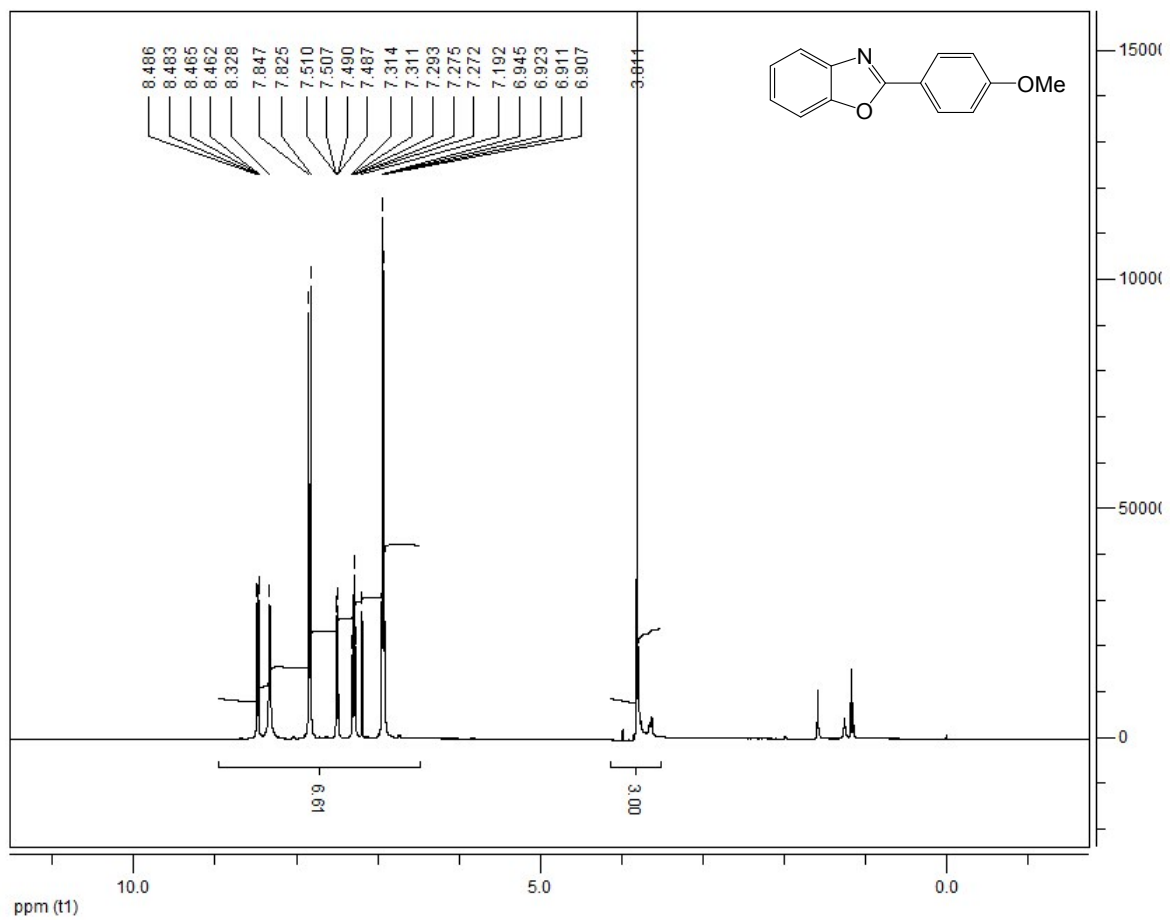

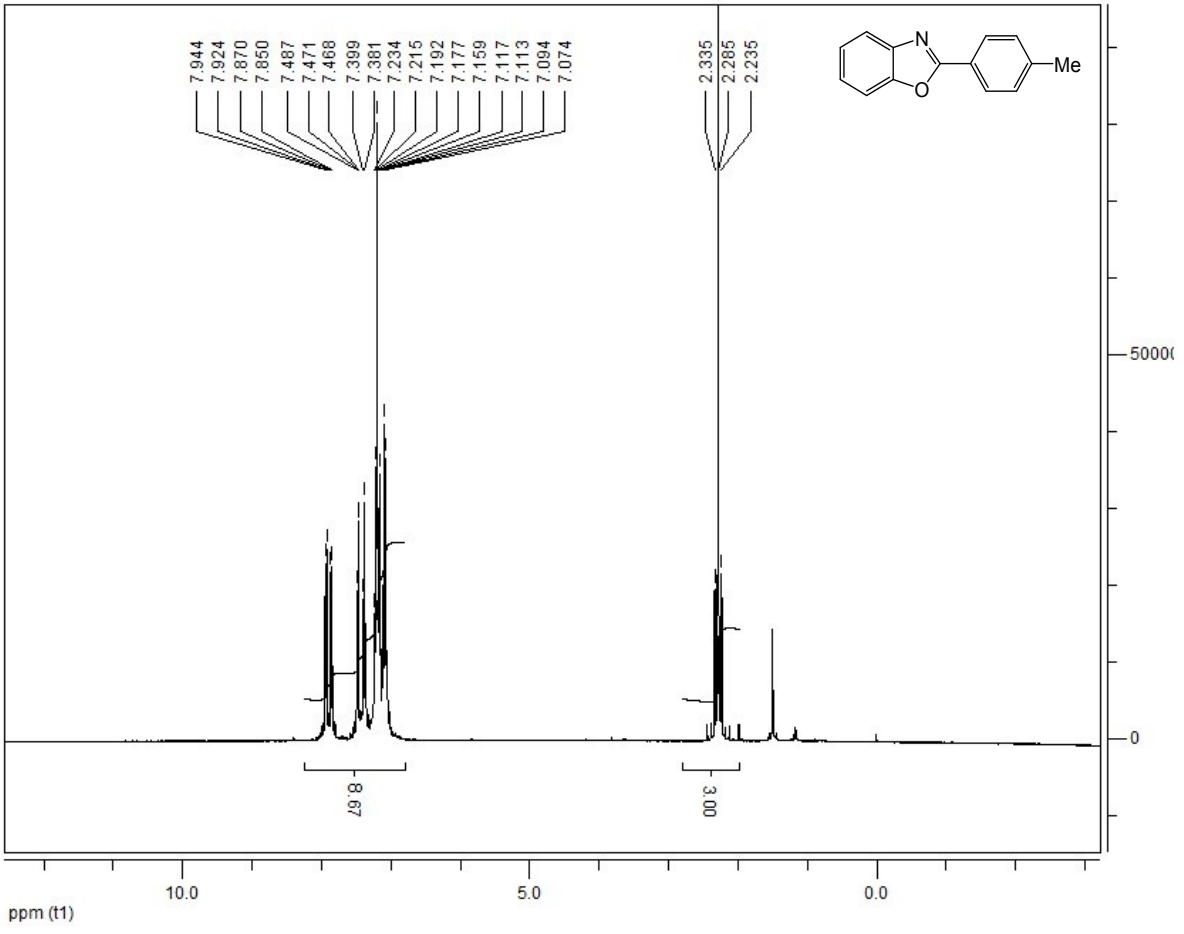

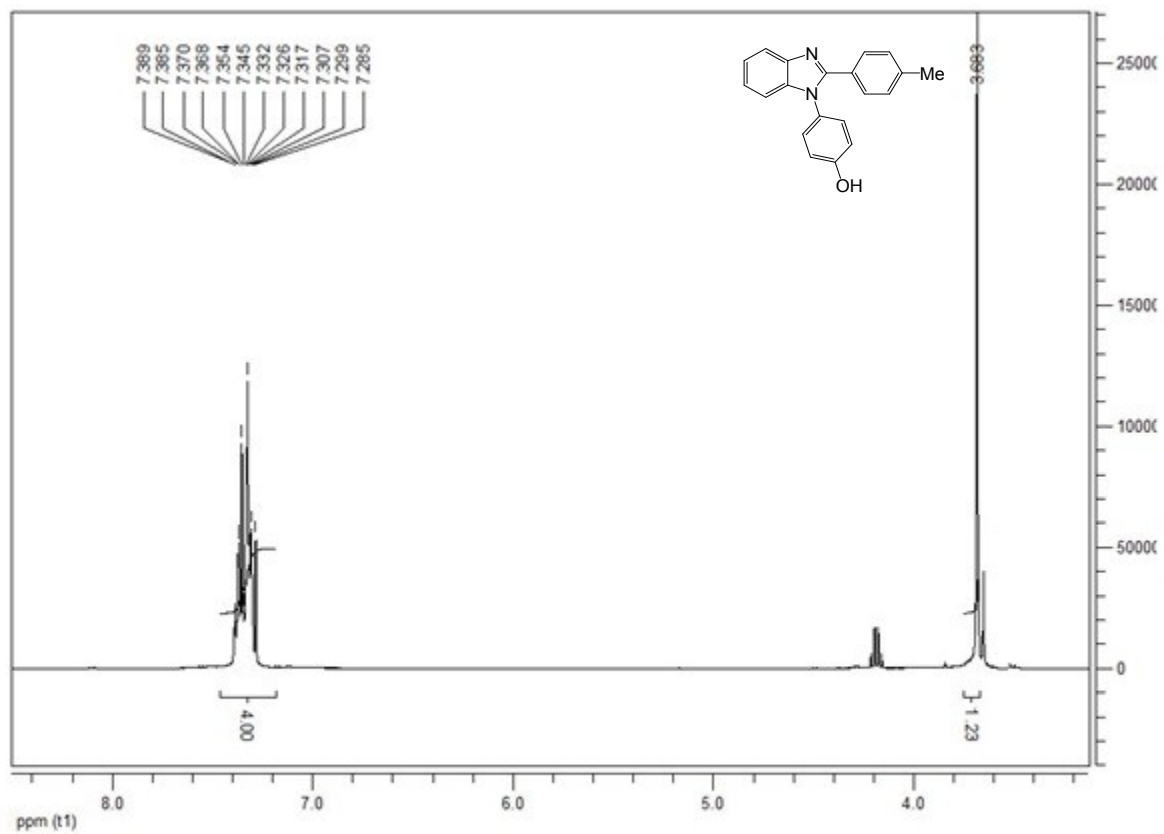

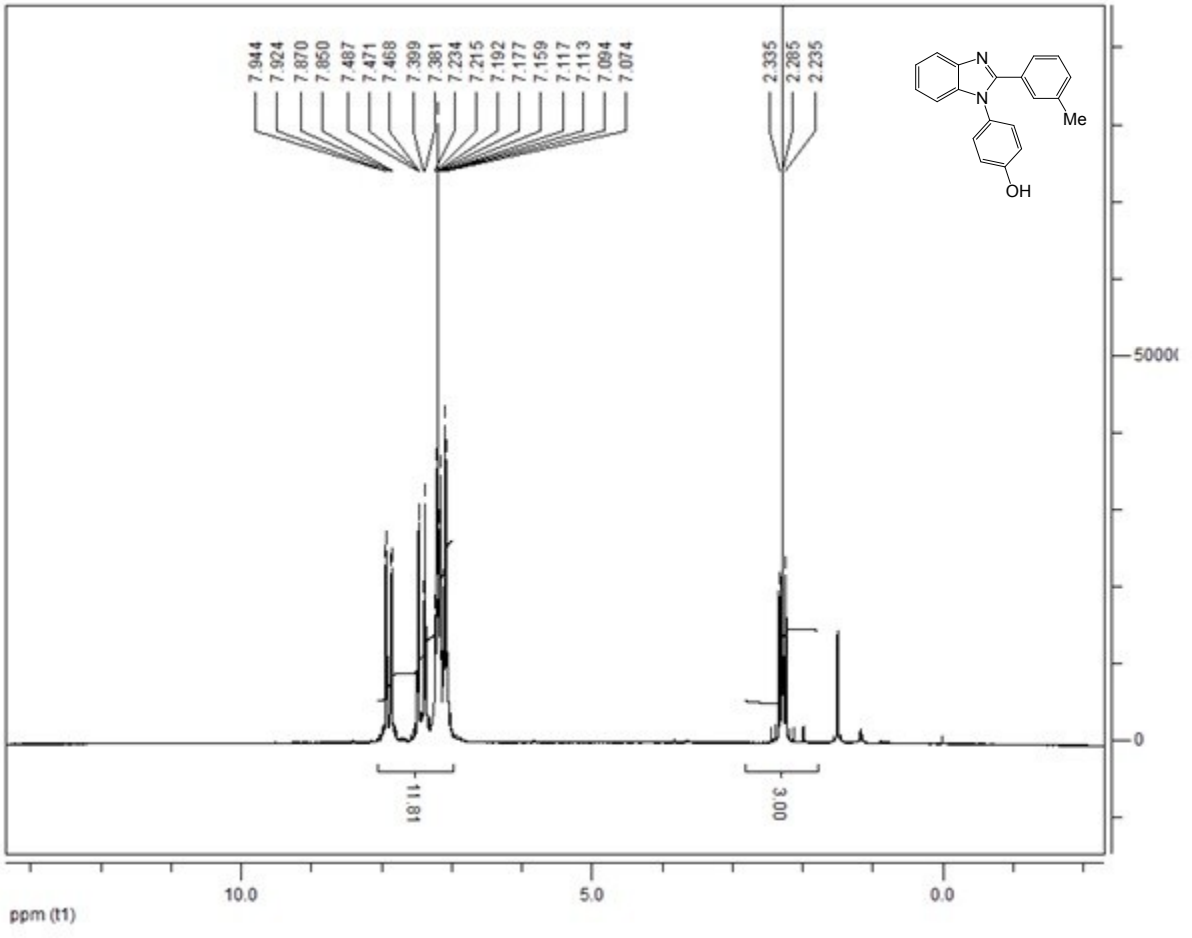

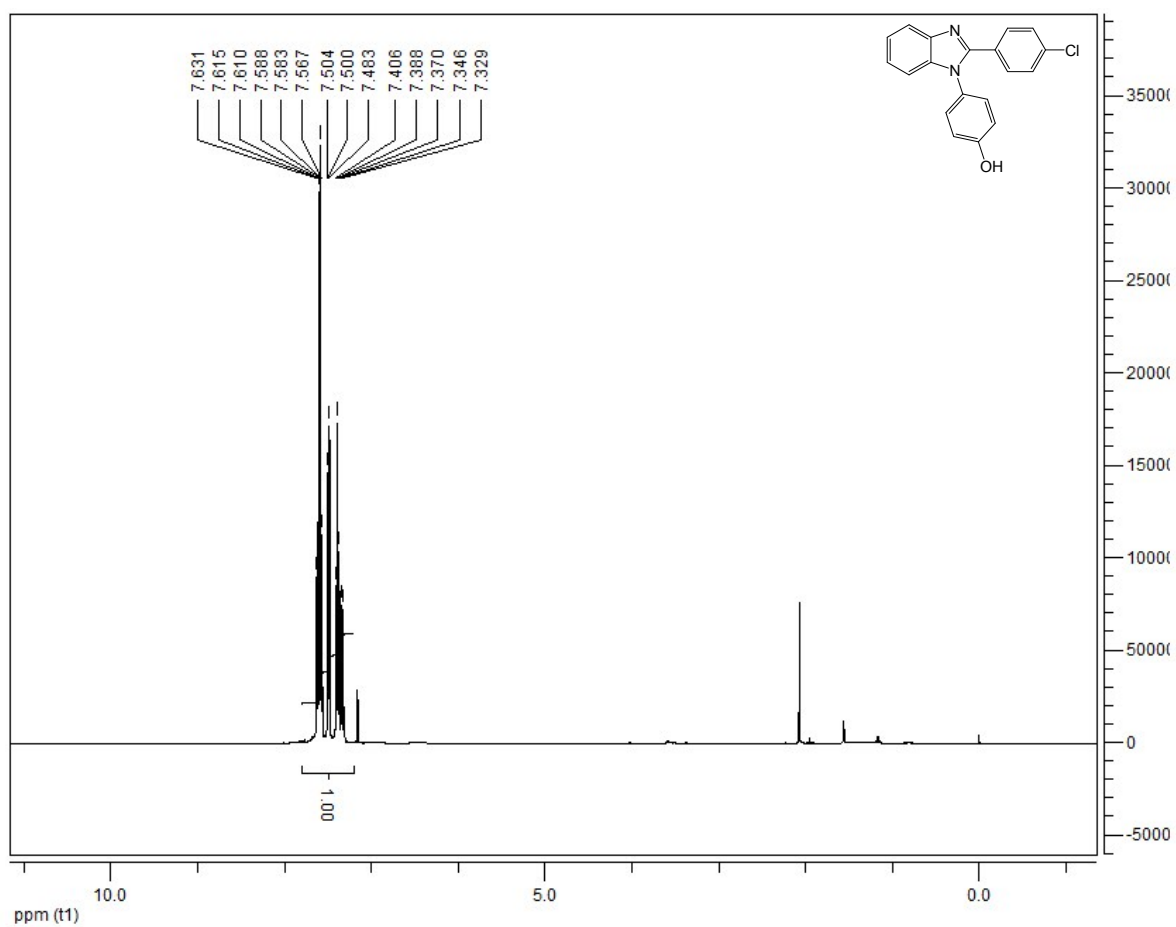



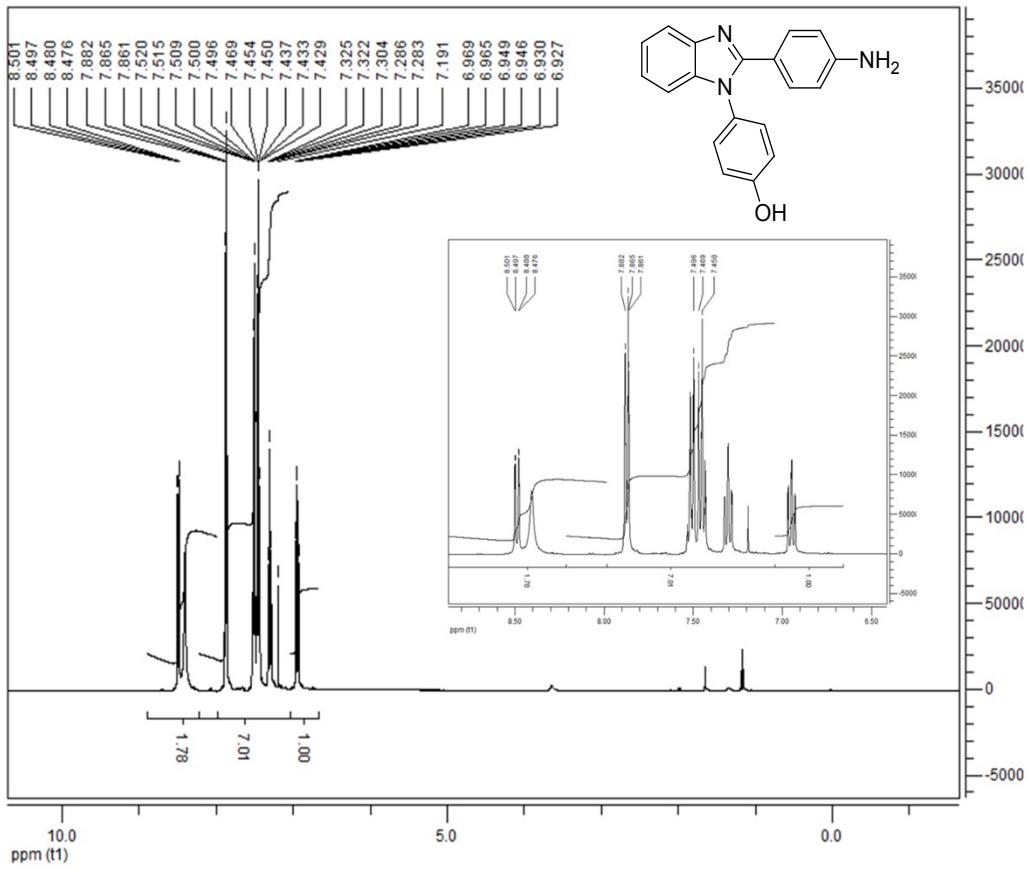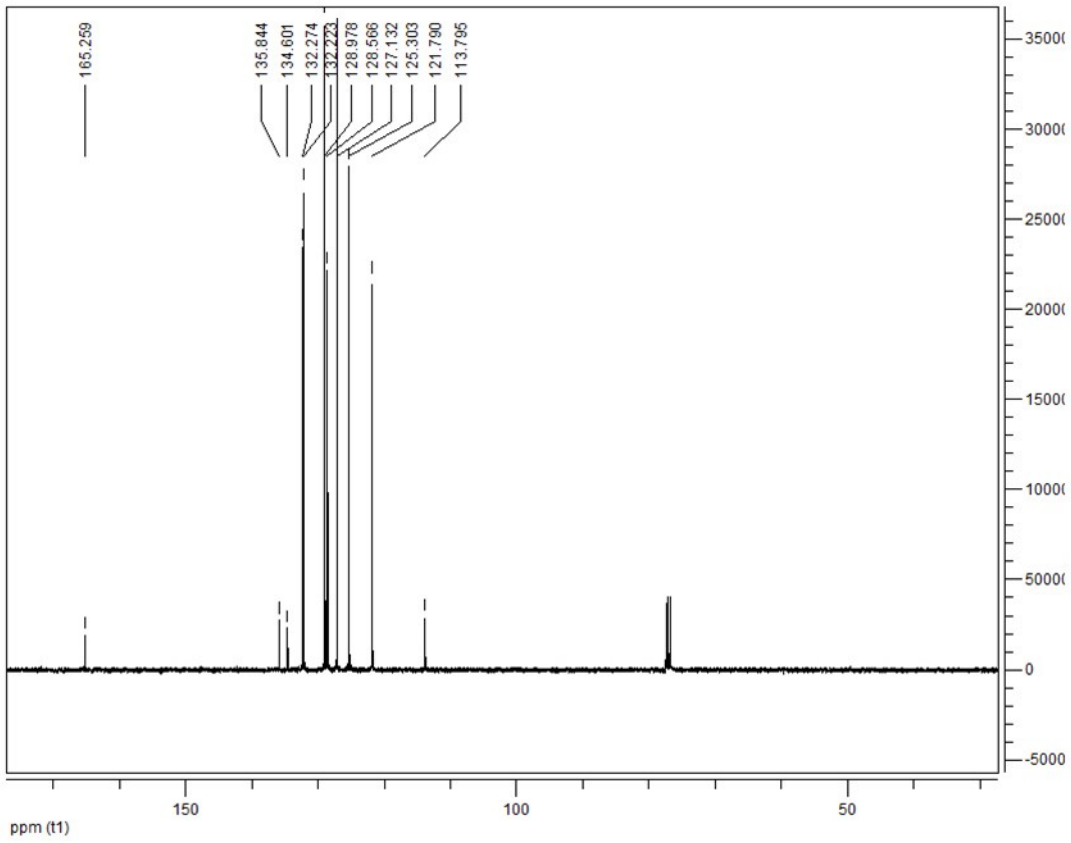

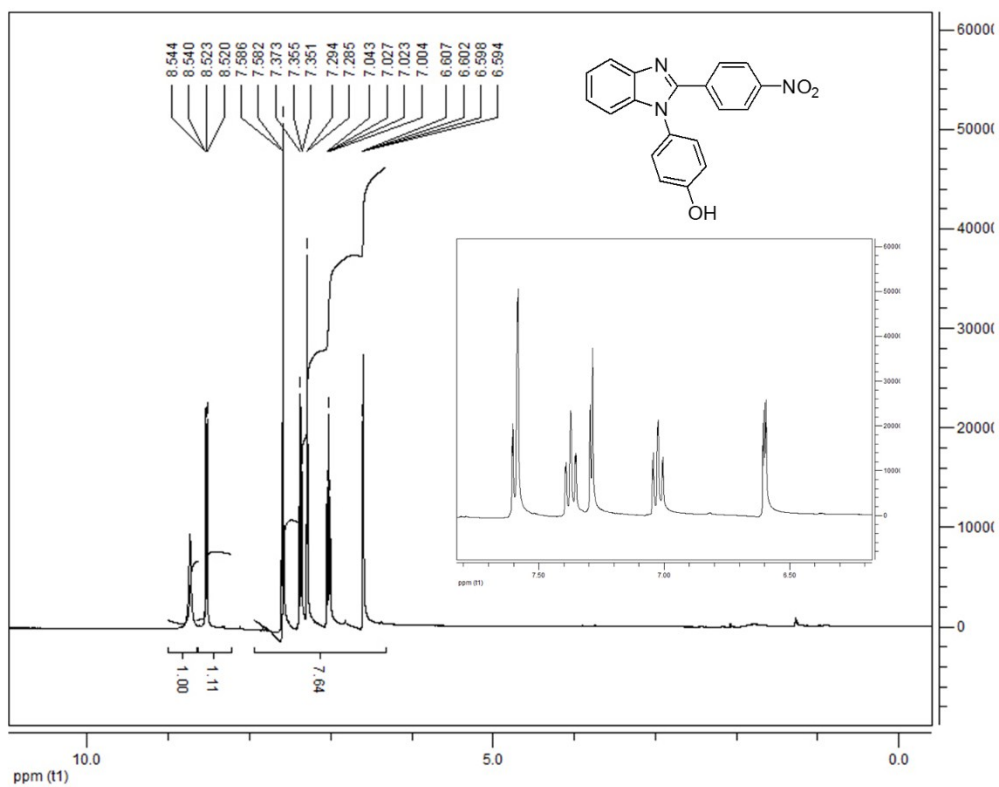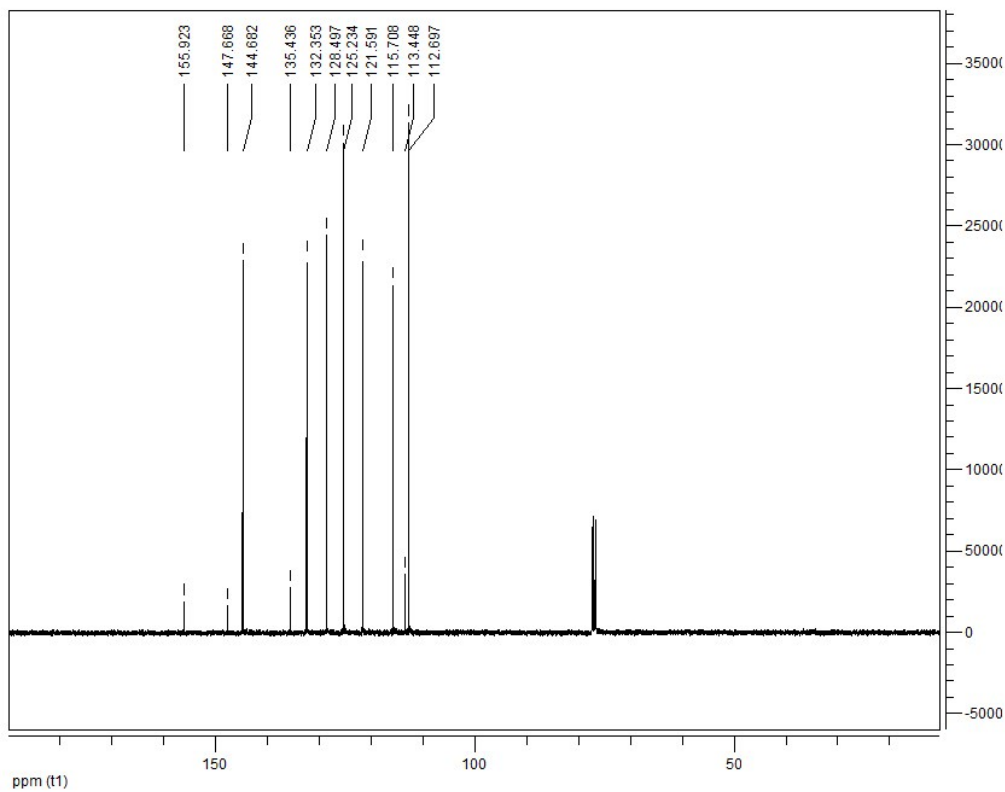

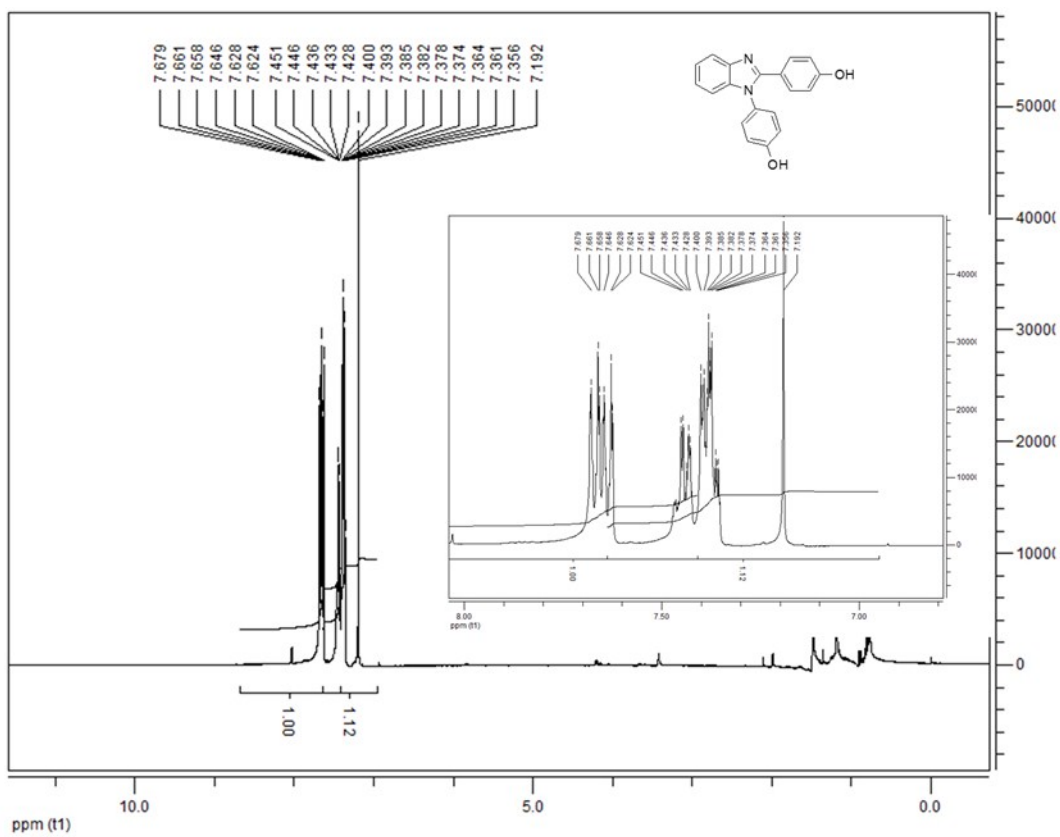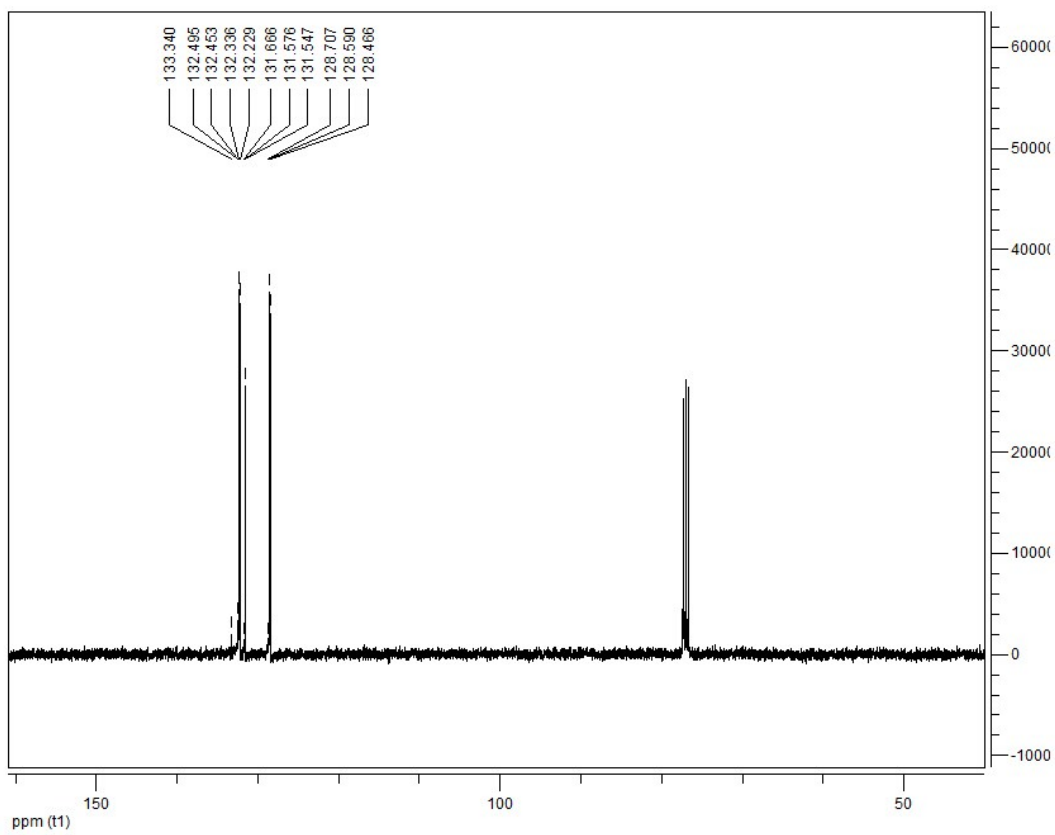

### 3. References

1. C. G. Mortimer, G. Wells, J. P. Crochard, E. L. Stone, T.D. Bradshaw, M. F. G. Stevens and A. D. Westwel, *J. Med. Chem.* 2006, **49**, 179-185.
2. D. Alagille, R. M. Baldwin, G. D. Tamagnan, *Tetrahedron Lett.* 2005, **46**, 1349–1351.
3. B. K. Paul, A. Ganguly, S. Karmakar, N. Guchhait, *J. Lumin.* 2013, **143**, 374–381.
4. R. G. Kalkhambkar, K. K. Laali, *Tetrahedron Lett.* 2012, **53**, 4212–4215.
